# Supplementary material
Source: ML conference proceedings conference paper supplement (https://proceedings.neurips.cc/paper_files/paper/2019/hash/2afe4567e1bf64d32a5527244d104cea-Abstract.html)
Supplement: Supplementary file [file 2afe4567e1bf64d32a5527244d104cea-Supplemental.zip]

---

# Supplementary Information for: Convolution with even-sized kernels and symmetric padding

---

Anonymous Author(s)

Affiliation

Address

email

## 1 S1 Compare with NAS models

Table S1: Test error rates (%) on CIFAR10 dataset. *c/o* and *mixup* denotes cutout [1] and mixup [14] data augmentation.

| Model                                          | Error (%)   | Params (M) |
|------------------------------------------------|-------------|------------|
| NASNet-A [15]                                  | 3.41        | 3.3        |
| PNASNet-5 [7]                                  | 3.41        | 3.2        |
| AmoebaNet-A [11]                               | <b>3.34</b> | 3.2        |
| Wide-DenseNet C3                               | 3.81        | 3.4        |
| Wide-DenseNet C2sp                             | 3.54        | 3.2        |
| NASNet-A + <i>c/o</i> [15]                     | 2.65        | 3.3        |
| Wide-DenseNet C2sp + <i>c/o</i> + <i>mixup</i> | <b>2.44</b> | 3.2        |

2 In Table S1, we compare C2sp with NAS models: NASNet [15], PNASNet [7], and AmoebaNet [11].  
3 We apply Wide-DenseNet [3] and adjust the width and depth ( $K = 48, L = 50$ ) to have approximately  
4 3.3M parameters. C2sp suffers less than 0.2% accuracy loss compared with state-of-the-art auto-  
5 generated models, and achieves better accuracy (+0.21%) when the augmentation is enhanced.  
6 Although NAS models leverage fragmented operators [9], e.g., pooling, group convolution, DWConv  
7 to improve accuracy with similar numbers of parameters, the regular-structured Wide-DenseNet has  
8 better memory and computational efficiency in runtime. In our reproduction, the training speeds on  
9 TitanXP for NASNet-A and Wide-DesNet are about 200 and 400 SPS, respectively.

## 10 S2 Implementation details

11 Results reported as mean $\pm$ std in tables or error bars in figures are trained for 5 times with different  
12 random seeds. The default settings for CIFAR classifications are as follows: We train models for  
13 300 epochs with mini-batch size 64 except for the results in Table S1, which run 600 epochs as in  
14 [15]. We use a cosine learning rate decay [8] starting from 0.1 except for DenseNet tests, where the  
15 piecewise constant decay performs better. The weight decay factor is  $1e-4$  except for parameters in  
16 depthwise convolutions. The standard augmentation [6] is applied and the  $\alpha$  equals to 1 in mixup  
17 augmentation.

18 For ImageNet classifications, all the models are trained for 100 epochs with mini-batch size 256. The  
19 learning rate is set to 0.1 initially and annealed according to the cosine decay schedule. We follow  
20 the data augmentation in [13]. Weight decay is  $1e-4$  in ResNet-50 and DenseNet-121 models, and  
21 decreases to  $4e-5$  in the other compact models. Some results are worse than reported in the original

papers. It is likely due to the inconsistency of mini-batch size, learning rate decay, or total training epochs, e.g., about 420 epochs in [12].

In generation tasks with GANs, we follow models and hyperparameters recommended in [5]. The learning rate is 0.2,  $\beta_1$  is 0.5 and  $\beta_2$  is 0.999 for Adam optimizer [4]. The mini-batch size is 64, the ratio of discriminator to generator updates is 5:1 ( $n_{\text{critic}} = 5$ ). The results in Table 3 and Figure 4 are trained for 200k and 500k discriminator update steps, respectively. We use the non-saturation loss [2] without gradient norm penalty. The spectral normalization [10] is applied in discriminators, no normalization is applied in generators.

## References

- [1] Terrance DeVries and Graham W Taylor. Improved regularization of convolutional neural networks with cutout. *arXiv preprint arXiv:1708.04552*, 2017.
- [2] Ian Goodfellow, Jean Pouget-Abadie, Mehdi Mirza, Bing Xu, David Warde-Farley, Sherjil Ozair, Aaron Courville, and Yoshua Bengio. Generative adversarial nets. In *Advances in neural information processing systems*, pages 2672–2680, 2014.
- [3] Gao Huang, Zhuang Liu, Laurens Van Der Maaten, and Kilian Q Weinberger. Densely connected convolutional networks. In *Proceedings of the IEEE conference on computer vision and pattern recognition*, pages 4700–4708, 2017.
- [4] Diederik P Kingma and Jimmy Ba. Adam: A method for stochastic optimization. In *International Conference on Learning Representations*, 2015.
- [5] Karol Kurach, Mario Lucic, Xiaohua Zhai, Marcin Michalski, and Sylvain Gelly. The gan landscape: Losses, architectures, regularization, and normalization. *arXiv preprint arXiv:1807.04720*, 2018.
- [6] Chen-Yu Lee, Saining Xie, Patrick Gallagher, Zhengyou Zhang, and Zhuowen Tu. Deeply-supervised nets. In *Artificial Intelligence and Statistics*, pages 562–570, 2015.
- [7] Chenxi Liu, Barret Zoph, Maxim Neumann, Jonathon Shlens, Wei Hua, Li-Jia Li, Li Fei-Fei, Alan Yuille, Jonathan Huang, and Kevin Murphy. Progressive neural architecture search. In *Proceedings of the European Conference on Computer Vision (ECCV)*, pages 19–34, 2018.
- [8] Ilya Loshchilov and Frank Hutter. Sgdr: Stochastic gradient descent with warm restarts. In *International Conference on Learning Representations*, 2017.
- [9] Ningning Ma, Xiangyu Zhang, Hai-Tao Zheng, and Jian Sun. Shufflenet v2: Practical guidelines for efficient cnn architecture design. In *Proceedings of the European Conference on Computer Vision (ECCV)*, pages 116–131, 2018.
- [10] Takeru Miyato, Toshiki Kataoka, Masanori Koyama, and Yuichi Yoshida. Spectral normalization for generative adversarial networks. In *International Conference on Learning Representations*, 2018.
- [11] Esteban Real, Alok Aggarwal, Yanping Huang, and Quoc V Le. Regularized evolution for image classifier architecture search. *arXiv preprint arXiv:1802.01548*, 2018.
- [12] Mark Sandler, Andrew Howard, Menglong Zhu, Andrey Zhmoginov, and Liang-Chieh Chen. Mobilenetv2: Inverted residuals and linear bottlenecks. In *Proceedings of the IEEE Conference on Computer Vision and Pattern Recognition*, pages 4510–4520, 2018.
- [13] Nathan Silberman and Sergio Guadarrama. Tensorflowslim image classification model library, 2017.
- [14] Hongyi Zhang, Moustapha Cisse, Yann N Dauphin, and David Lopez-Paz. mixup: Beyond empirical risk minimization. In *International Conference on Learning Representations*, 2018.
- [15] Barret Zoph, Vijay Vasudevan, Jonathon Shlens, and Quoc V Le. Learning transferable architectures for scalable image recognition. In *Proceedings of the IEEE conference on computer vision and pattern recognition*, pages 8697–8710, 2018.
